# Supplementary material
Source: Springer Nature journal article supplement (http://www.springermedizin.de/resource/supplementary/13049_2009_62_MOESM3_ESM.pdf/9665800)

Pro-inflammatory

Immune response

Anti-inflammatory

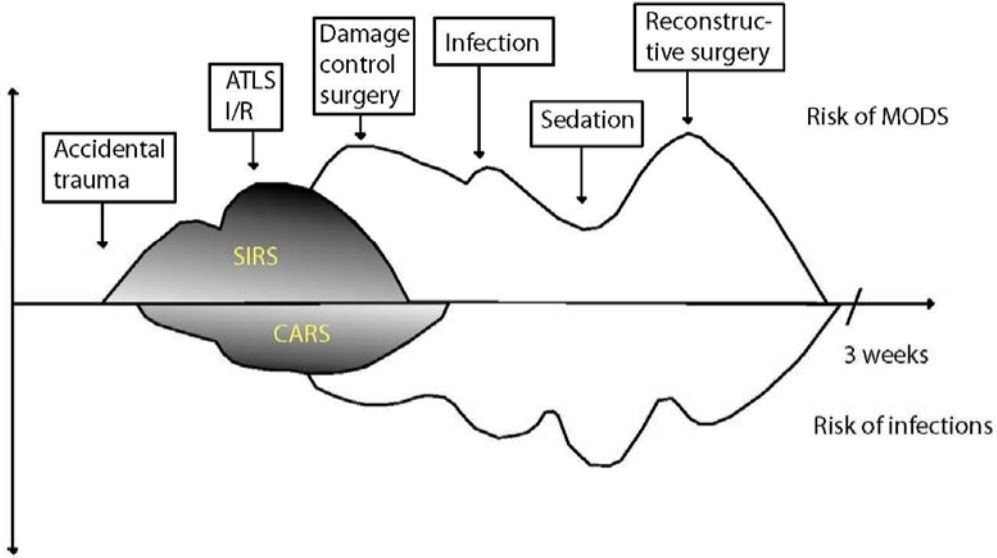

Supplement: MOESM3 [file 9665800]
